# Supplementary material
Source: publisher figshare collection journal article supplement (https://tandf.figshare.com/ndownloader/files/30696080)
Supplement: Supplementary file 1 [file 30696080]

**Supplementary Table 1 Intraobserver and interobserver reliability of fetal cardiac indices**

| Fetal Cardiac index | Intraclass correlation (95% CI) | Interobserver correlation (95% CI) |
| --- | --- | --- |
| Global sphericity index | 0.97(0.93-0.98) | 0.88(0.75-0.95) |
| Left ventricle global longitudinal strain | 0.84(0.70-0.92) | 0.82(0.63-0.92) |
| Left ventricle fractional area change | 0.82(0.66-0.91) | 0.83(0.65-0.92) |
| Left ventricle ejection fraction | 0.81(0.64-0.91) | 0.83(0.64-0.92) |
| Right ventricle global longitudinal strain | 0.86(0.74-0.93) | 0.75(0.49-0.88) |
| Right ventricle fractional area change | 0.91(0.82-0.96) | 0.81(0.60-0.91) |
